# Supplementary material for: Novel Technique to Measure Pulse Wave Velocity in Brain Vessels Using a Fast Simultaneous Multi-Slice Excitation Magnetic Resonance Sequence
Source: MDPI journal article supplement (doi:10.3390/s21196352), 2021-09-23
Supplement: s1 [file s1]

# Supplementary Materials: Novel Technique to Measure Pulse Wave Velocity in Brain Vessels Using a Fast Simultaneous Multi-Slice Excitation Magnetic Resonance Sequence

Ju-Yeon Jung <sup>1</sup>, Yeong-Bae Lee <sup>2,3,\*</sup> and Chang-Ki Kang <sup>1,2,4,\*</sup>

<sup>1</sup> Department of Health Science, Gachon University Graduate School, Gachon University, Incheon 21936, Korea; 9955me@gachon.ac.kr

<sup>2</sup> Neuroscience Research Institute, Gachon University, Incheon 21565, Korea

<sup>3</sup> Department of Neurology, Gil Medical Center, Gachon University College of Medicine, Incheon 21565, Korea

<sup>4</sup> Department of Radiological Science, College of Health Science, Gachon University, Incheon 21936, Korea

\* Correspondence: yeongbaelee@gachon.ac.kr (Y.-B.L.); ckkang@gachon.ac.kr (C.-K.K.); Tel.: +82-32-460-3346 (Y.-B.L.); +82-32-820-4110 (C.-K.K.)

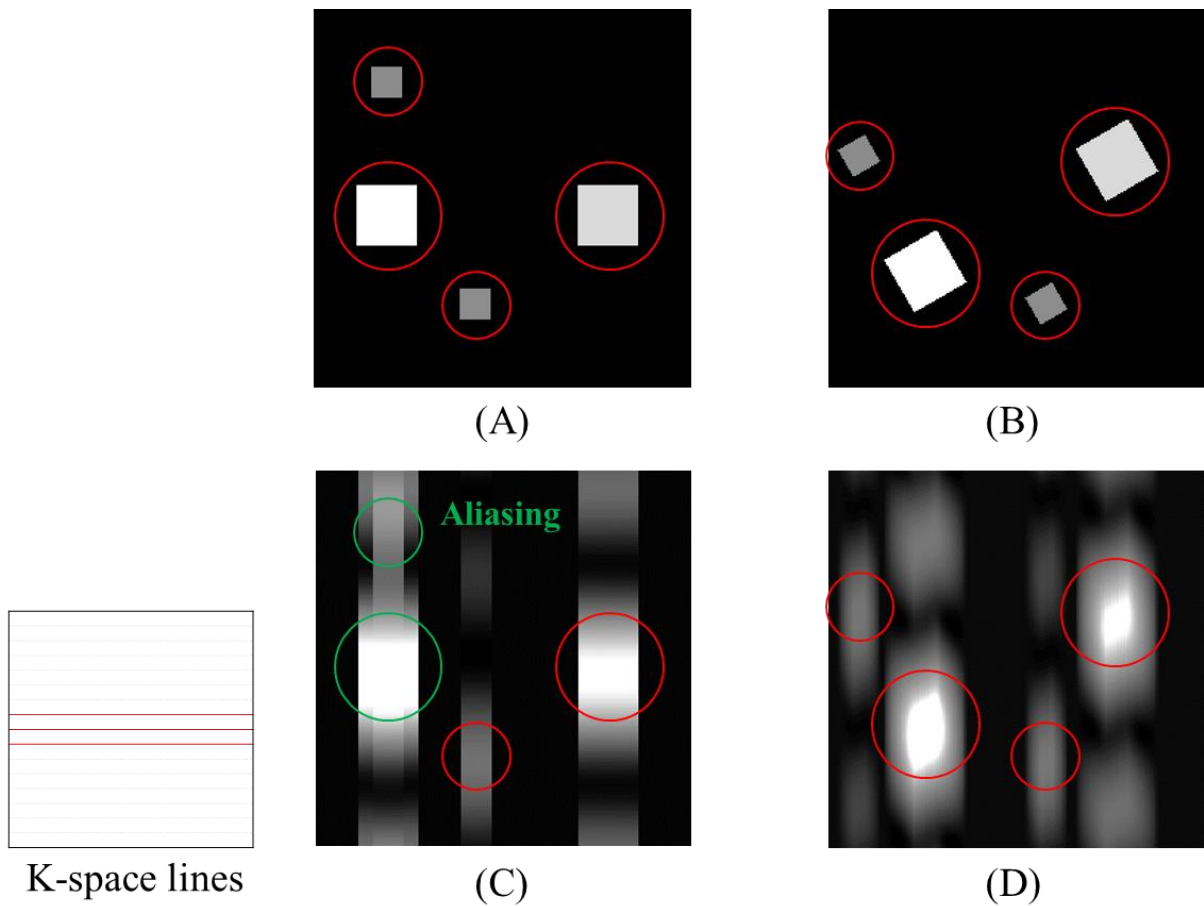

**Figure S1.** Simulation results of SMS-K technique for avoiding aliasing artifacts. (A) Original image which can cause the aliasing artifact in SMS-K technique. (B) Rotated image which is rotated 30 degrees counterclockwise in image A. (C and D) Reconstructed images of (A) and (B), respectively. Note that only 3 k-space lines were used for image reconstruction. Circles indicate the locations of the simulated structures, and the green ones produce aliased signals.
